# Supplementary material for: Microwave directed metal-free regiodivergent synthesis of 1,2-teraryls and study of supramolecular interactions
Source: Royal Society of Chemistry journal article supplement (doi:10.1039/c5ra25752b), 2016-01-01

# Microwave directed metal-free regiodivergent synthesis of 1,2-teraryls and study of supramolecular interactions

Surjeet Singh, Shally, Ranjay Shaw, Reena Yadav, Abhinav Kumar and Ramendra Pratap\*

## Supporting Information

**Ramendra Pratap \***

|                                                                          |      |
|--------------------------------------------------------------------------|------|
| Contents                                                                 | page |
| <sup>1</sup> H and <sup>13</sup> C spectra of all the reported compounds | 2-12 |

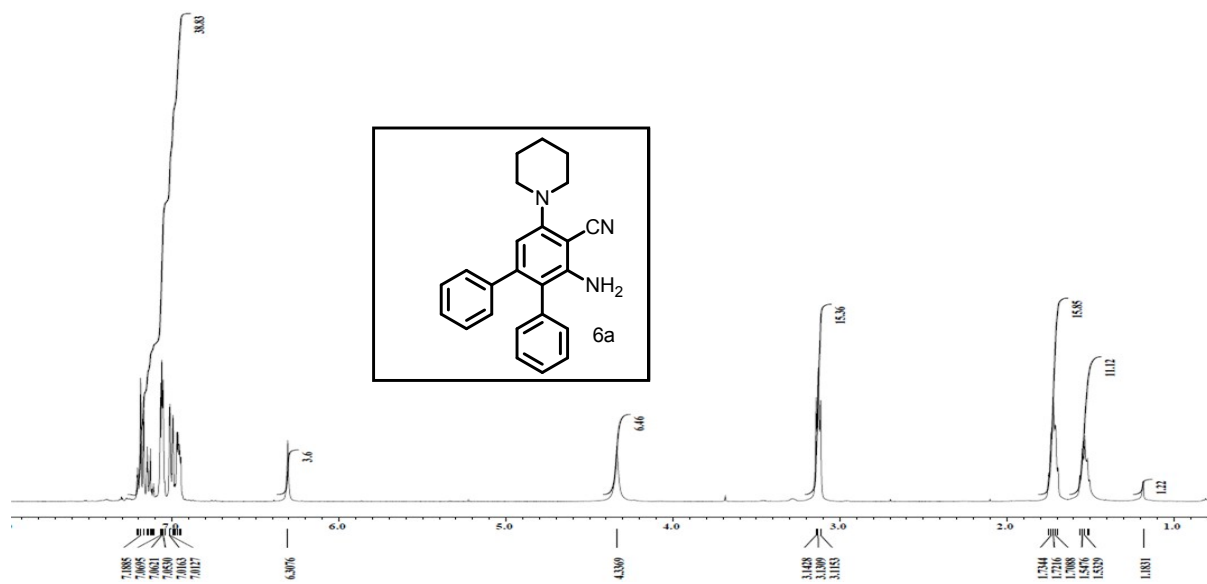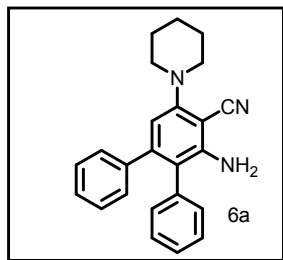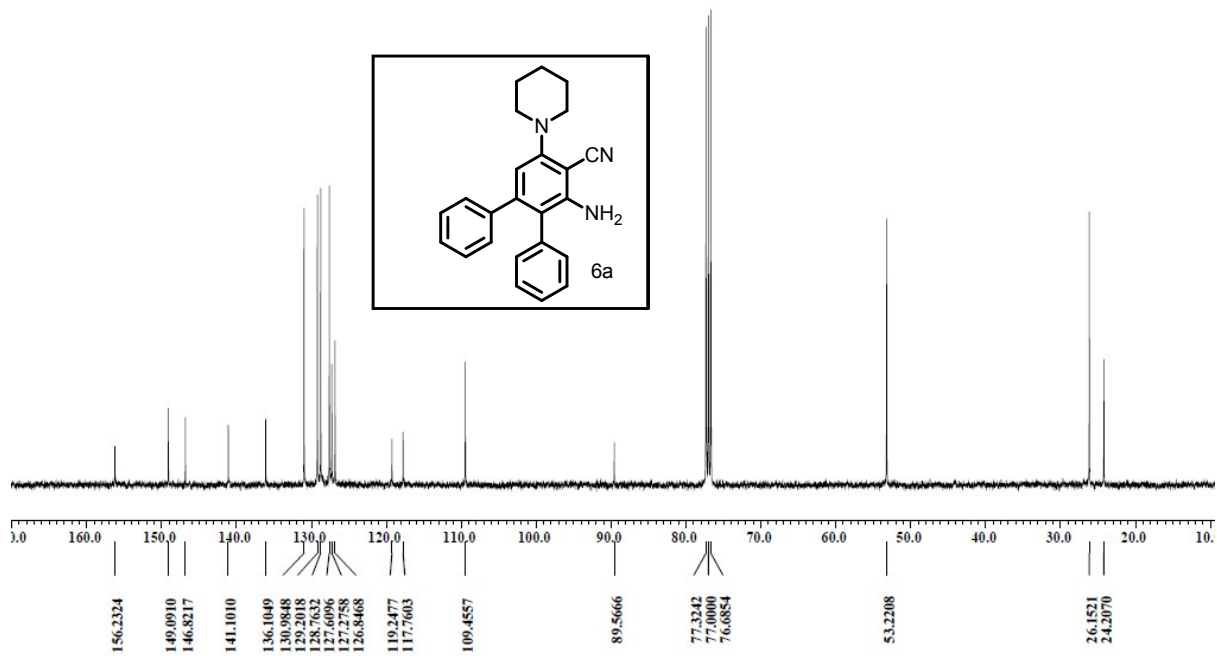

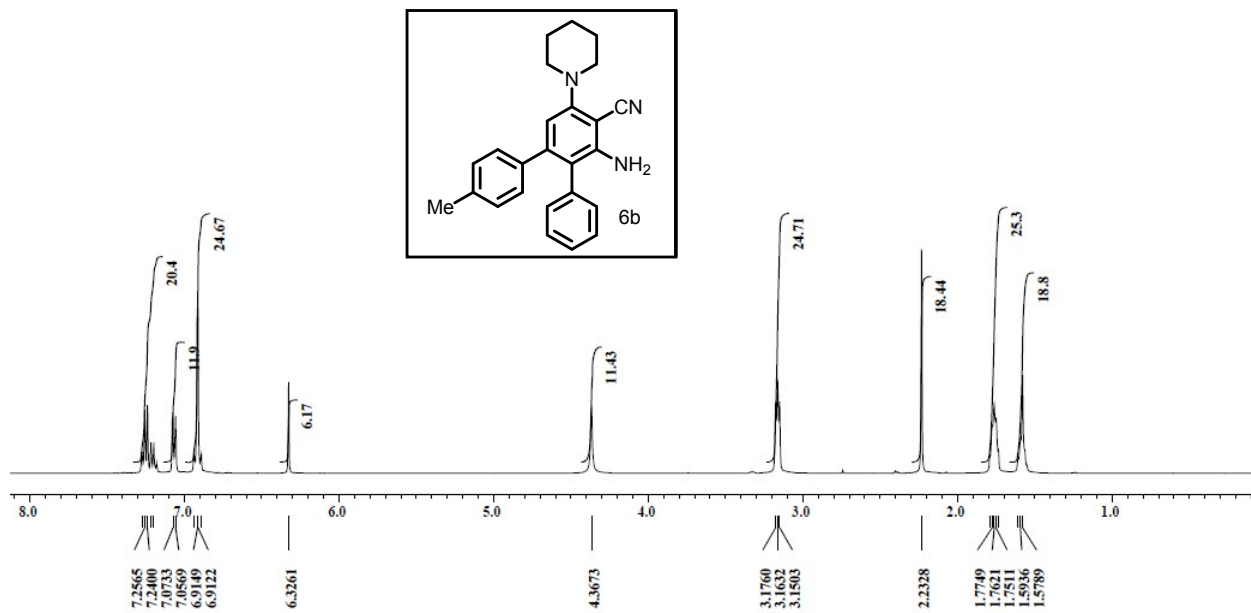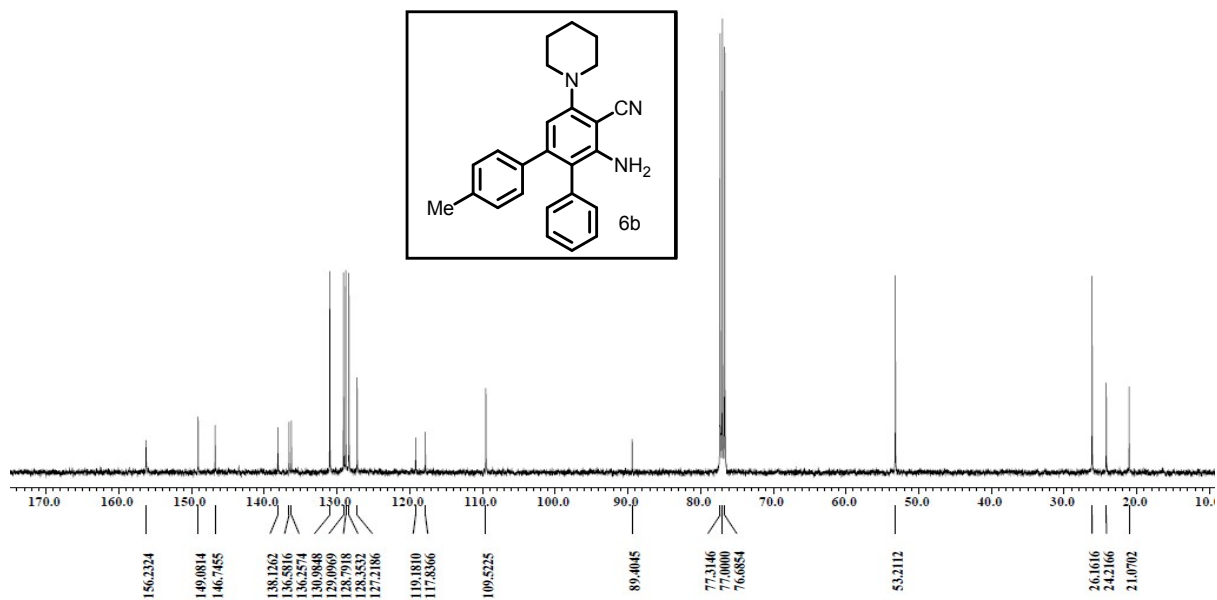

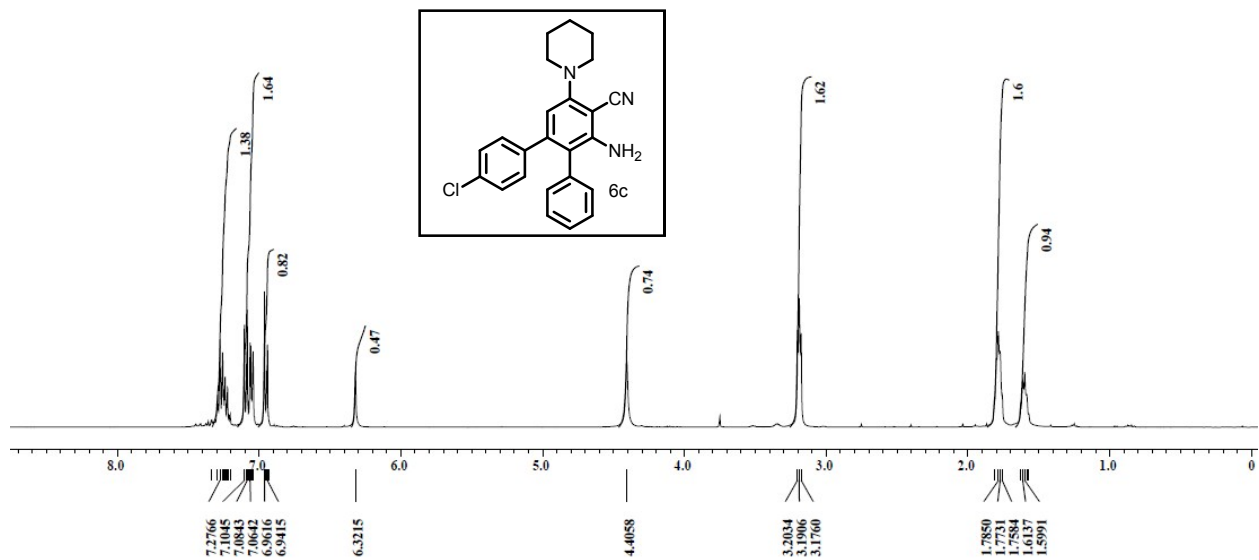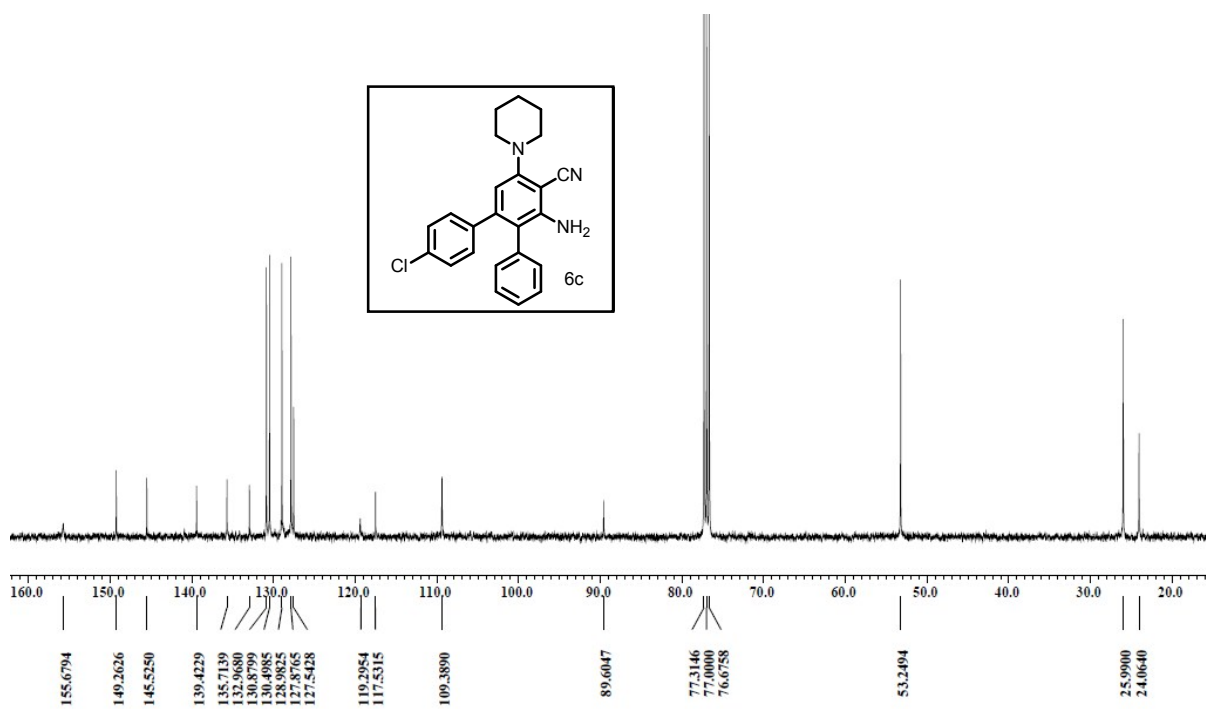

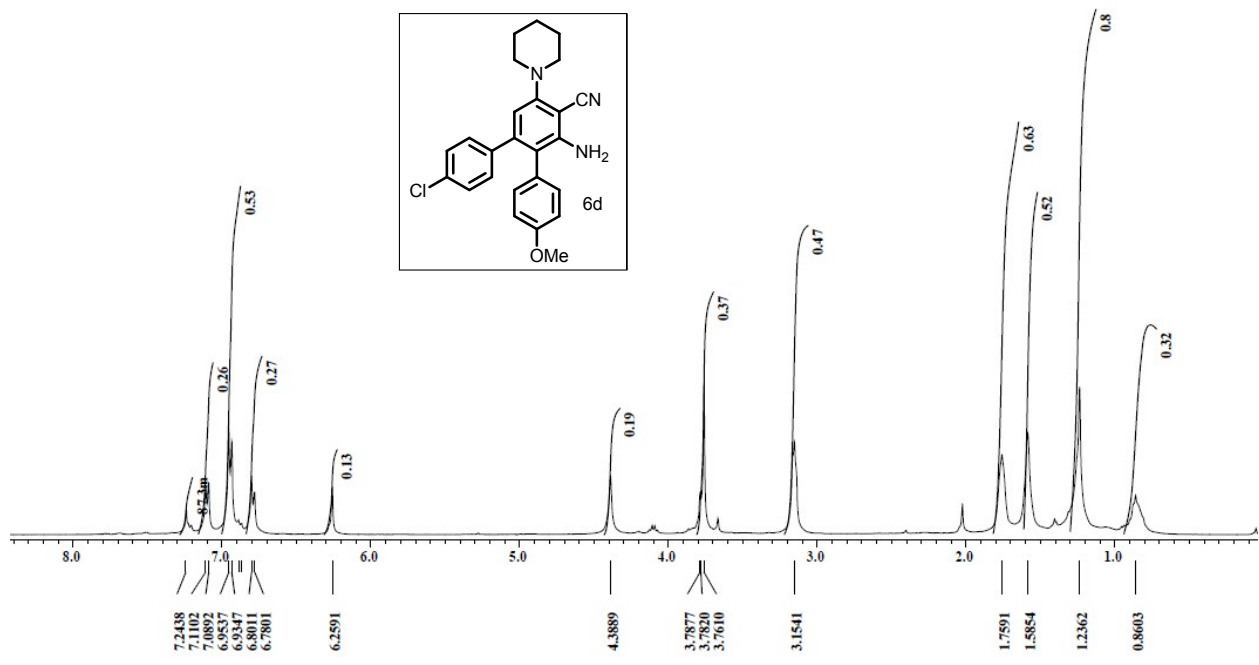

Z

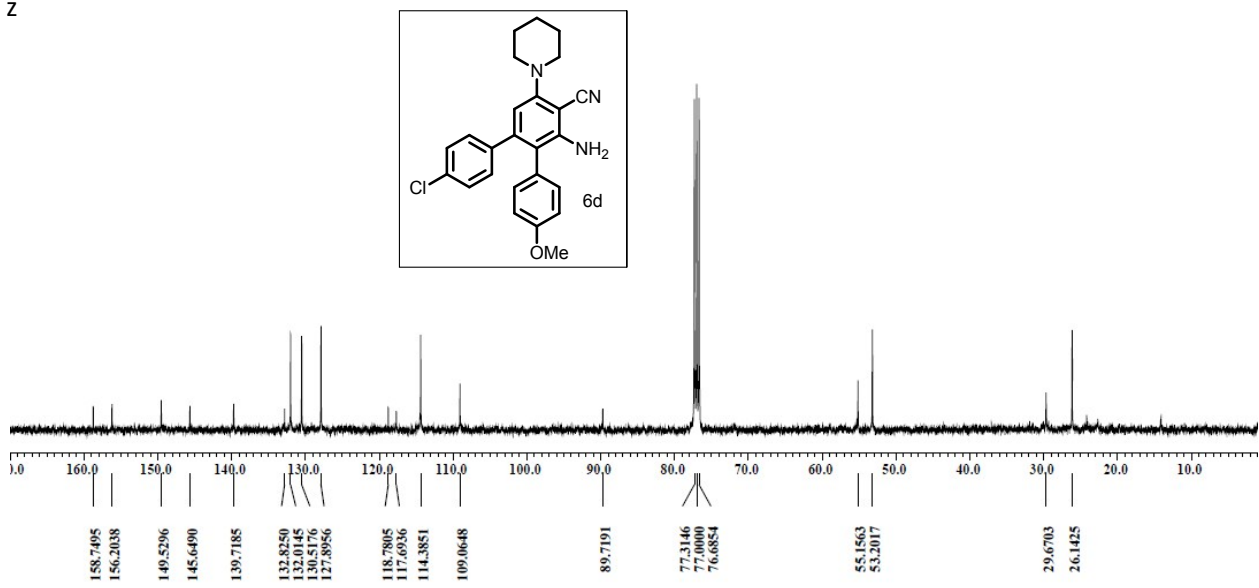

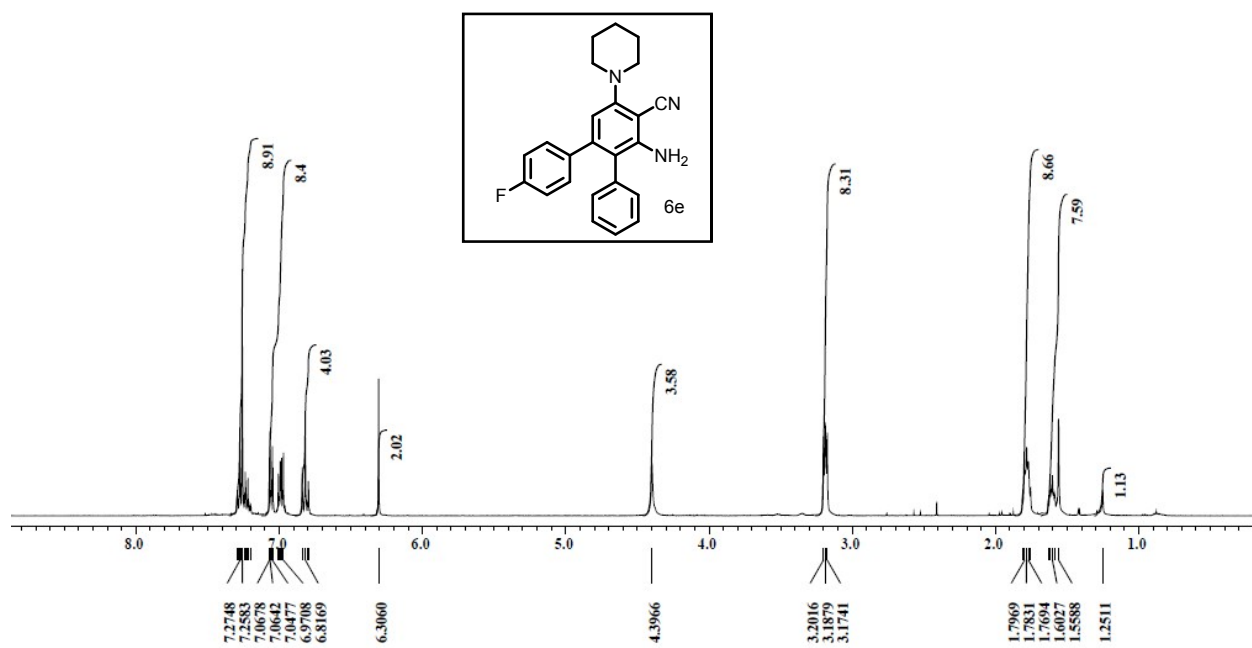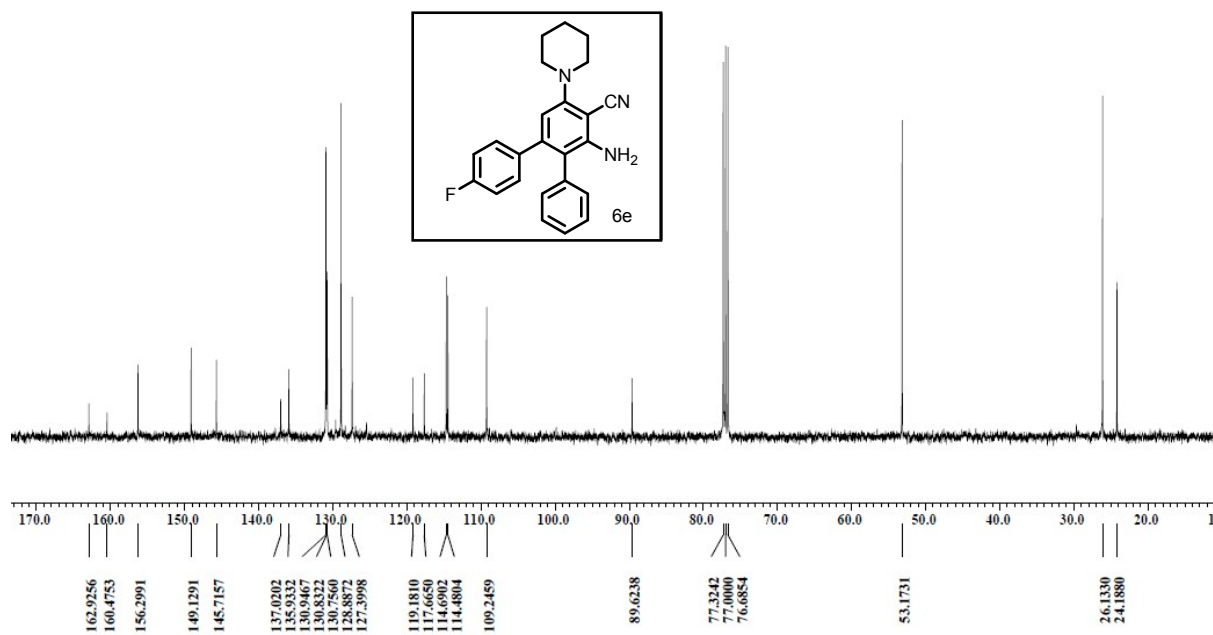

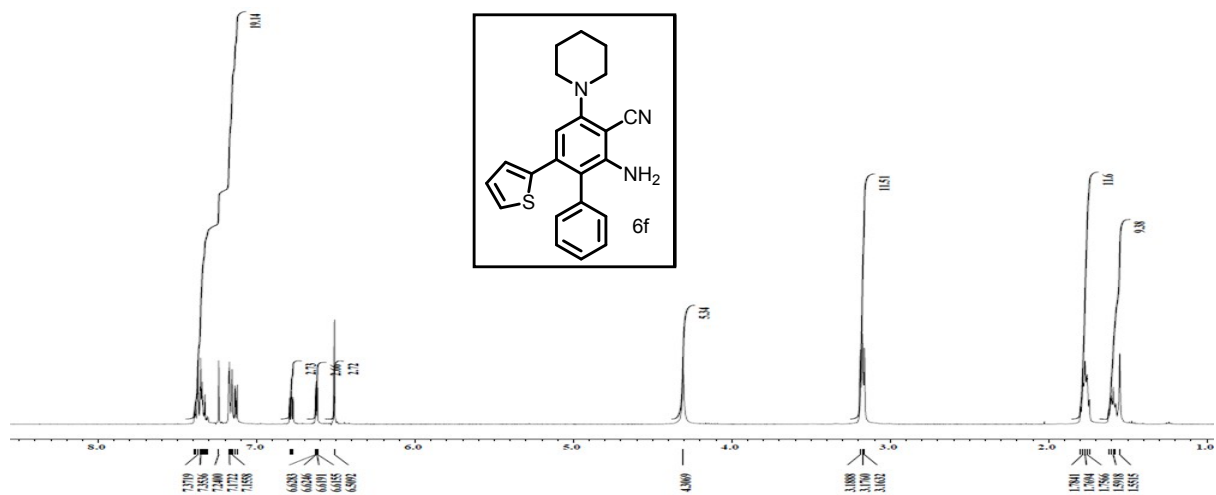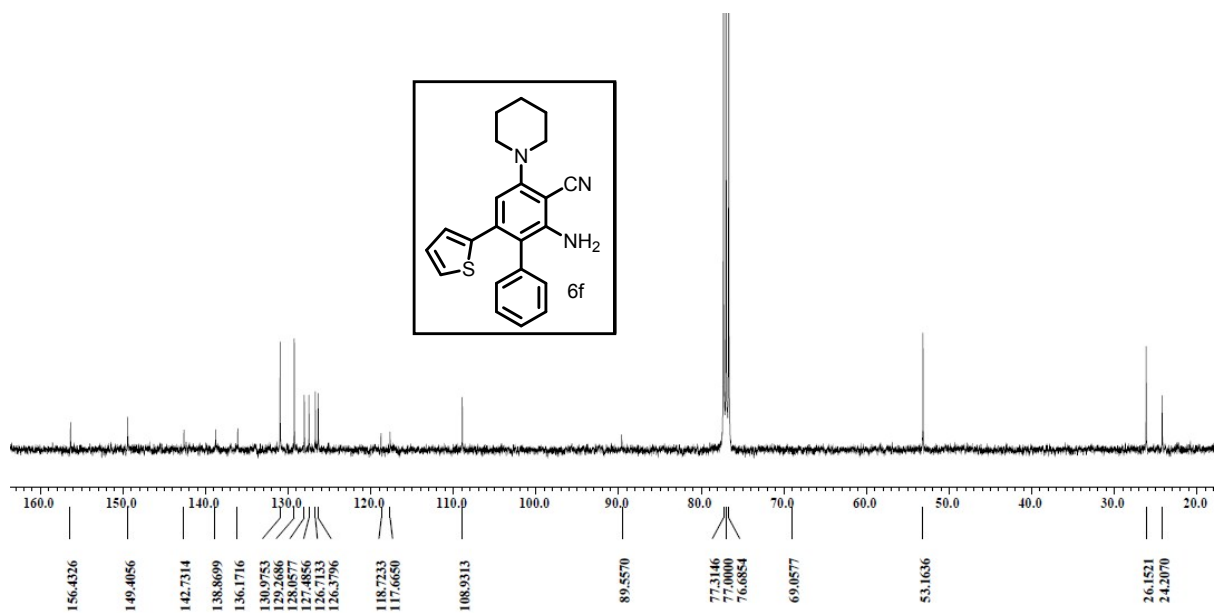

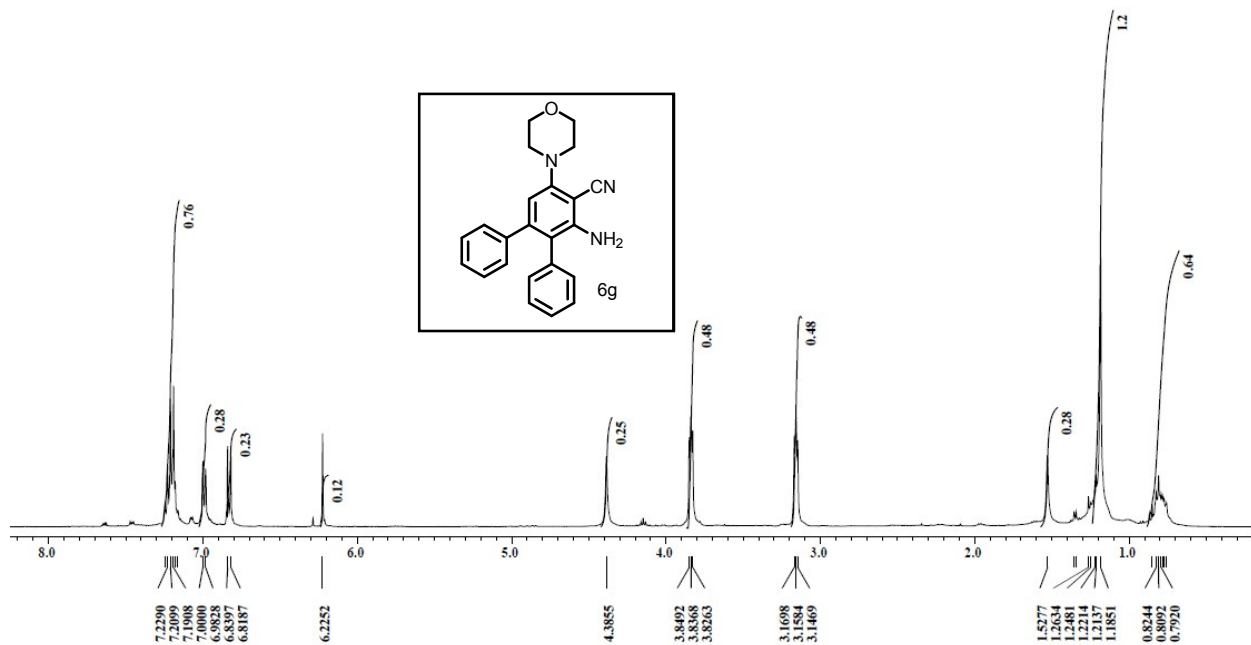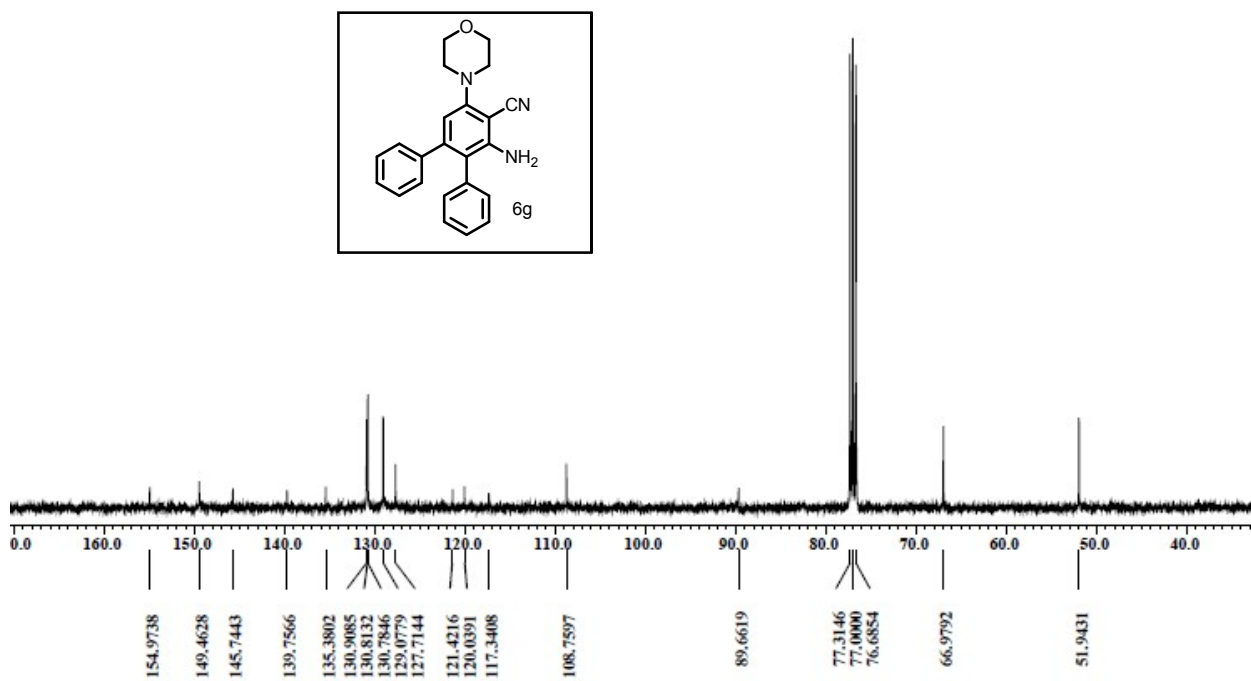



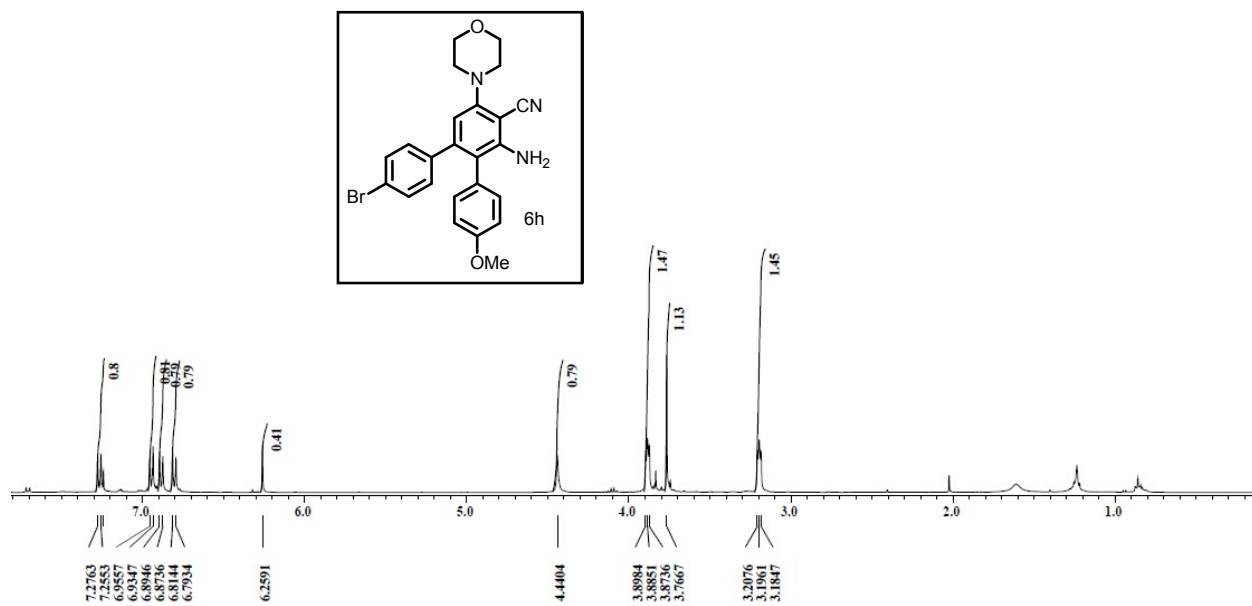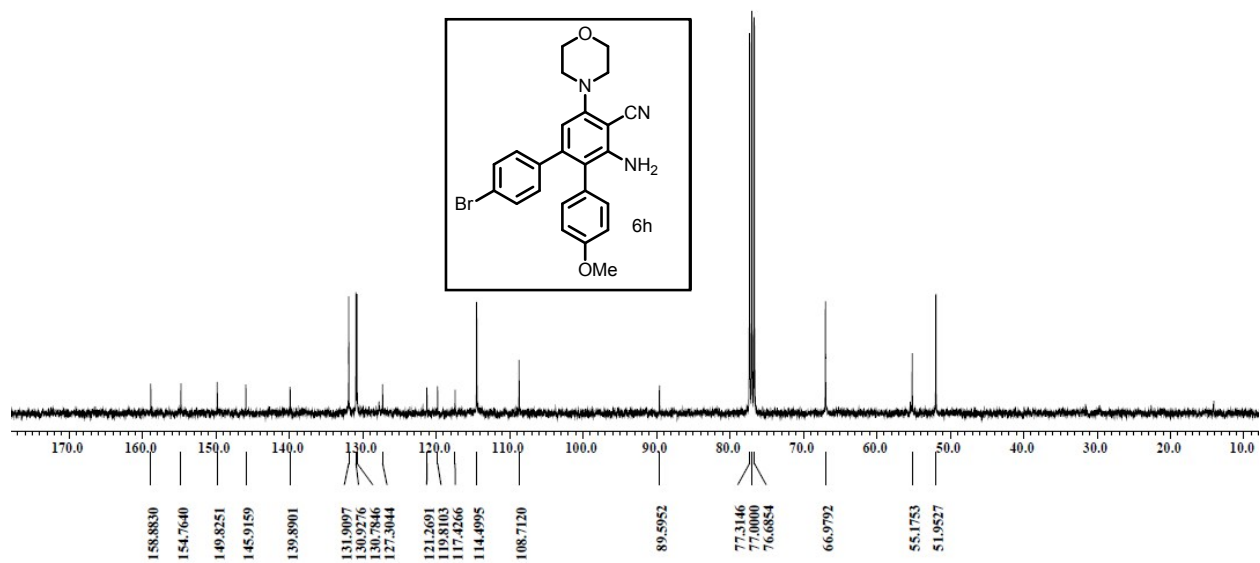

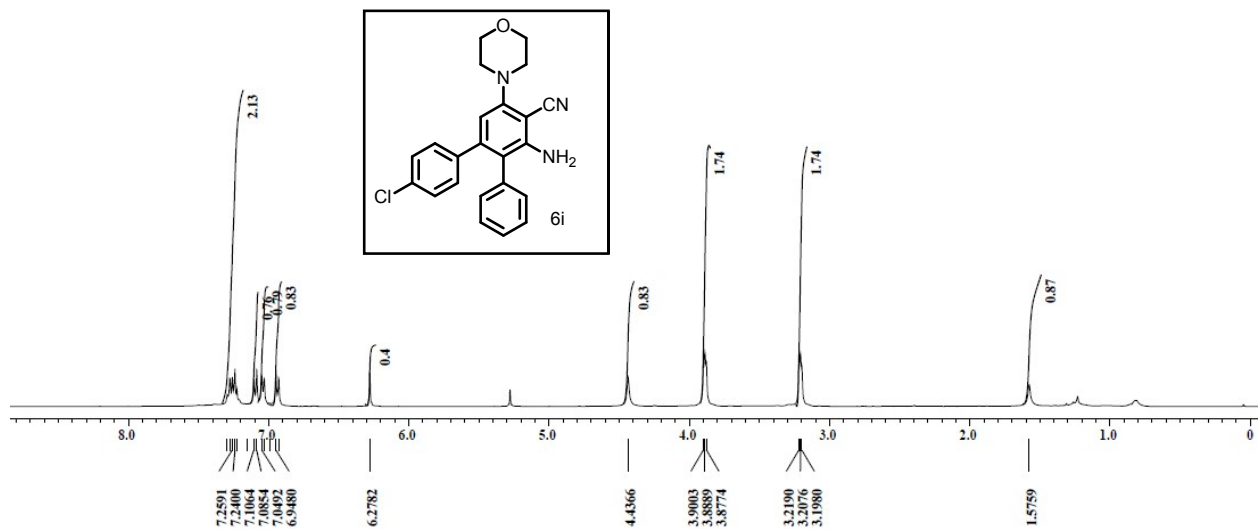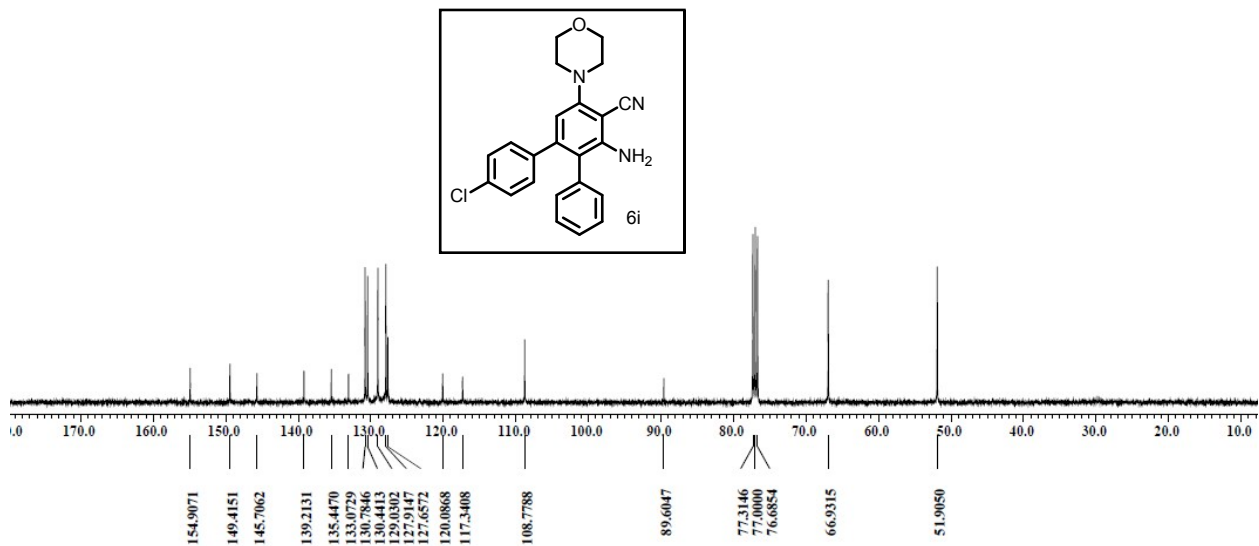

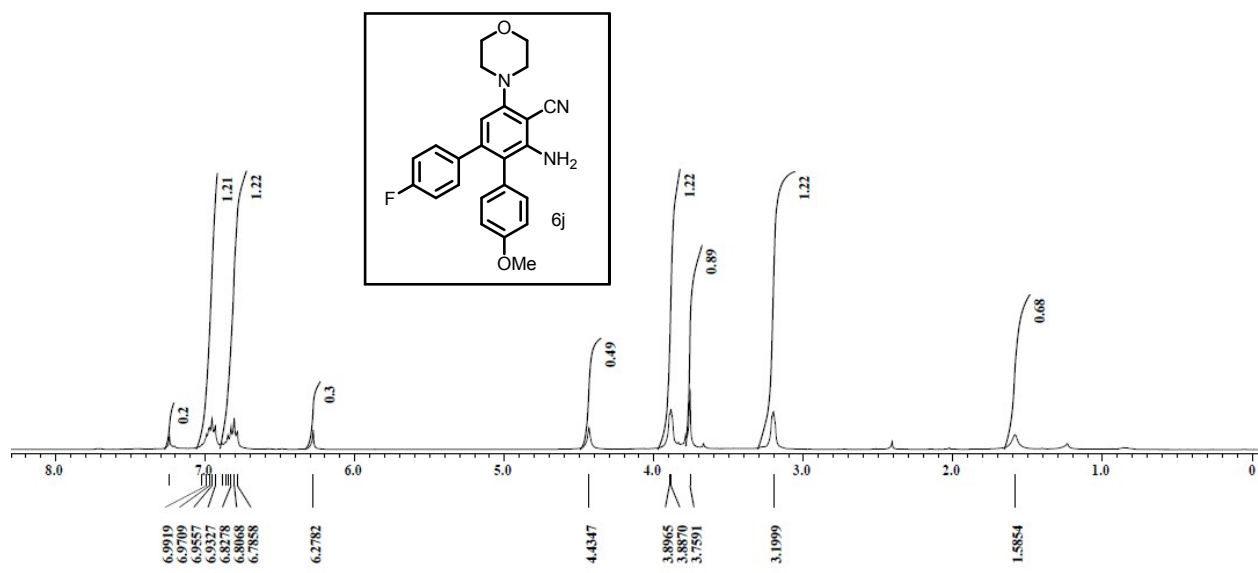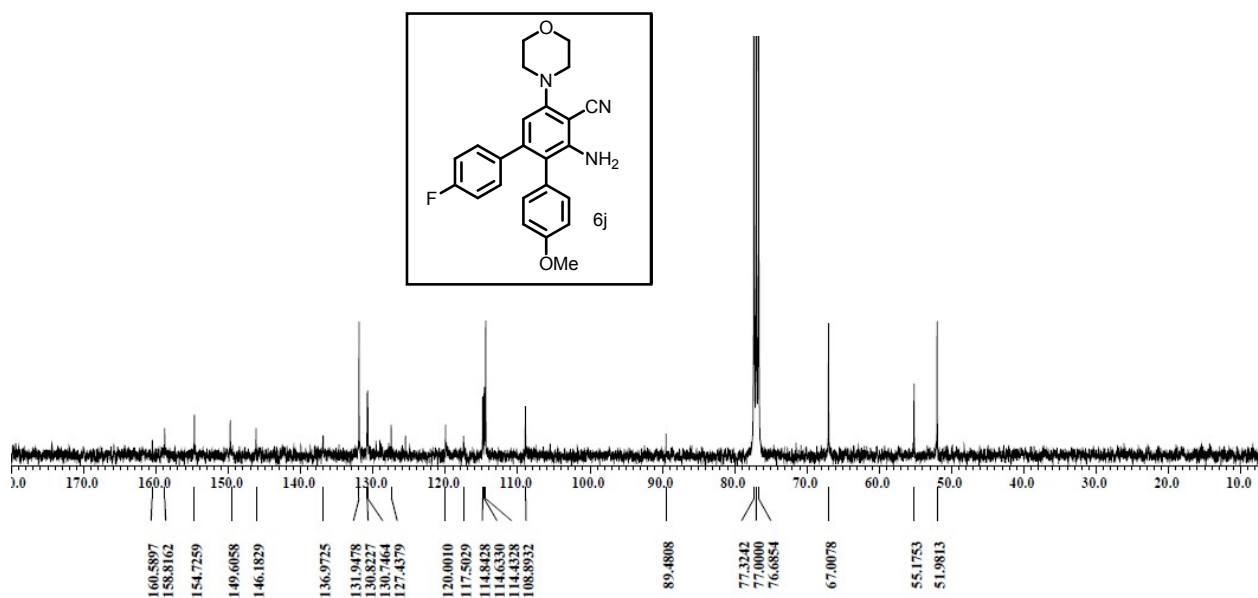

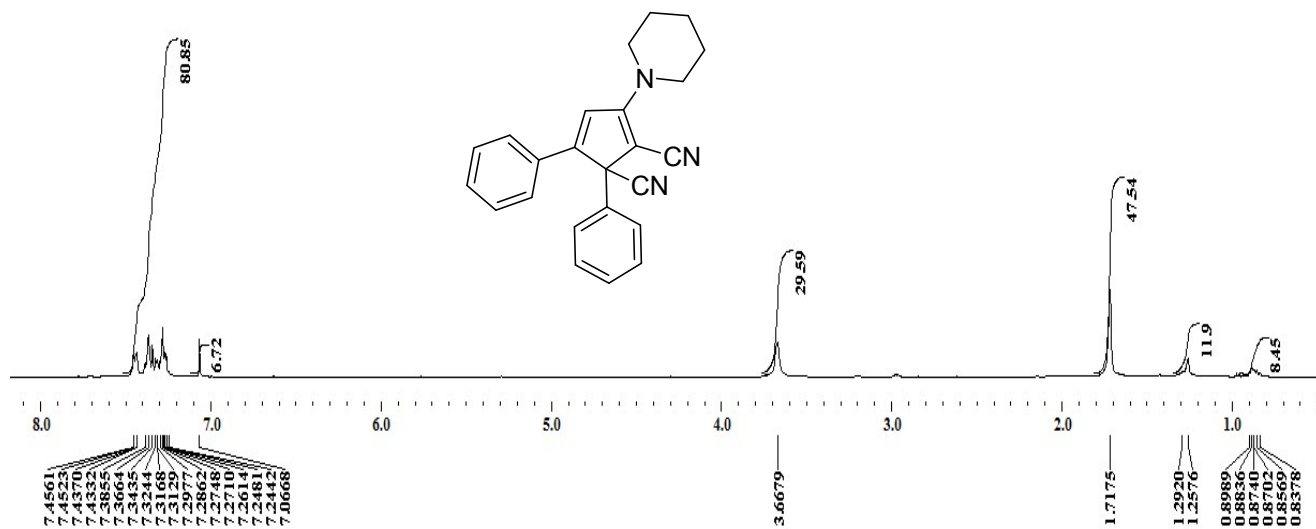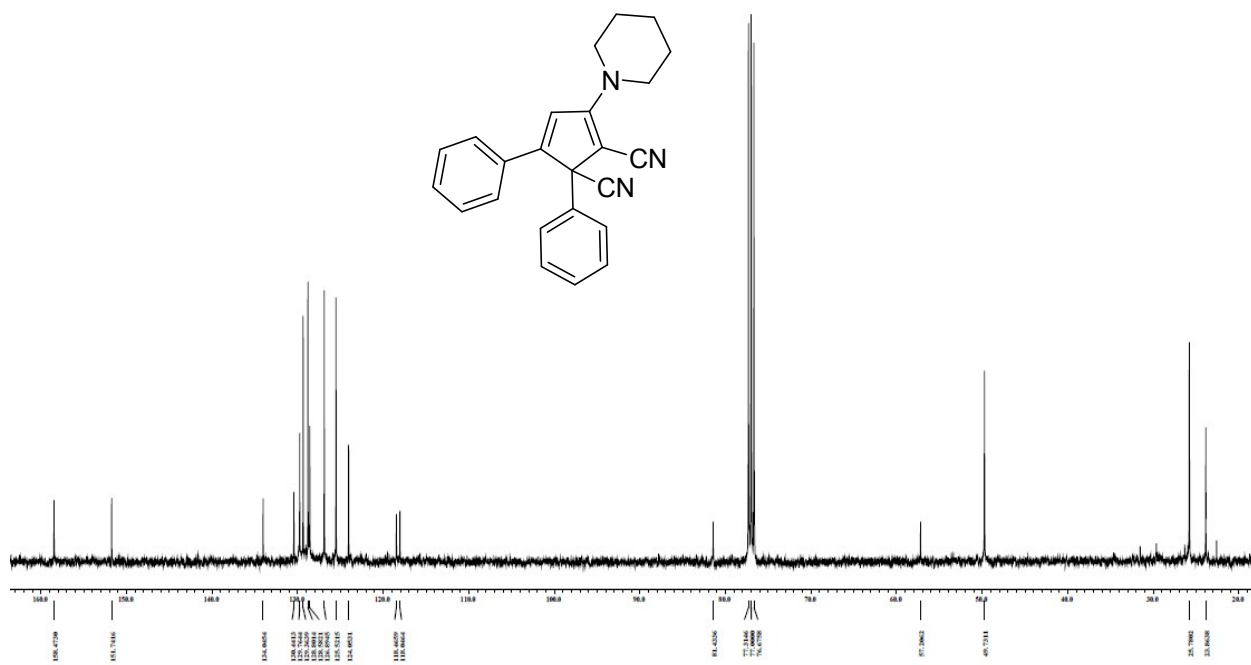

Supplement: c5ra25752b1.pdf [file c5ra25752b1.pdf]
